# Supplementary material
Source: PubMed Central journal article supplement (PMC1413654)

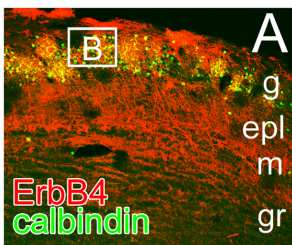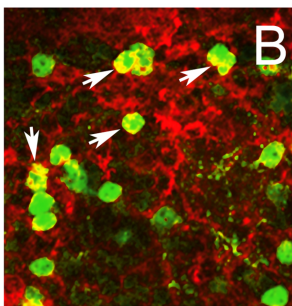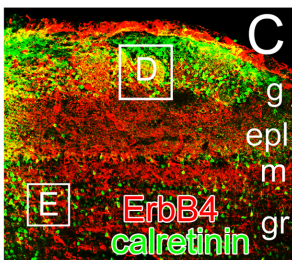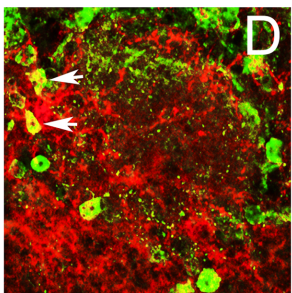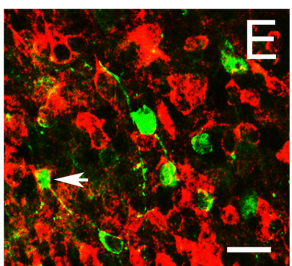

Supplement: pnas_0510410103_1.pdf [file pnas_0510410103_1.pdf]

**A**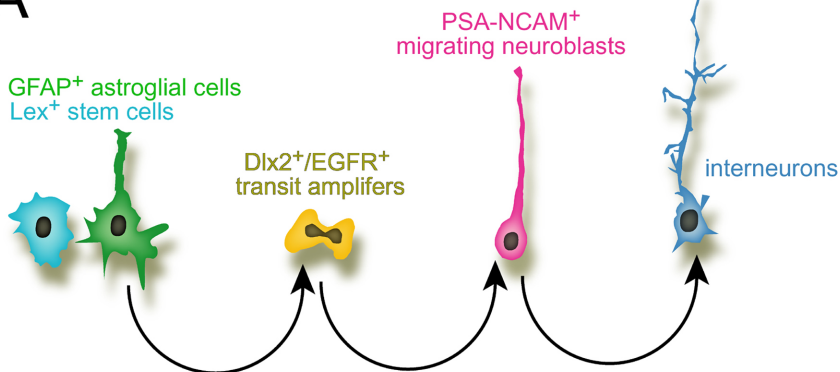**B**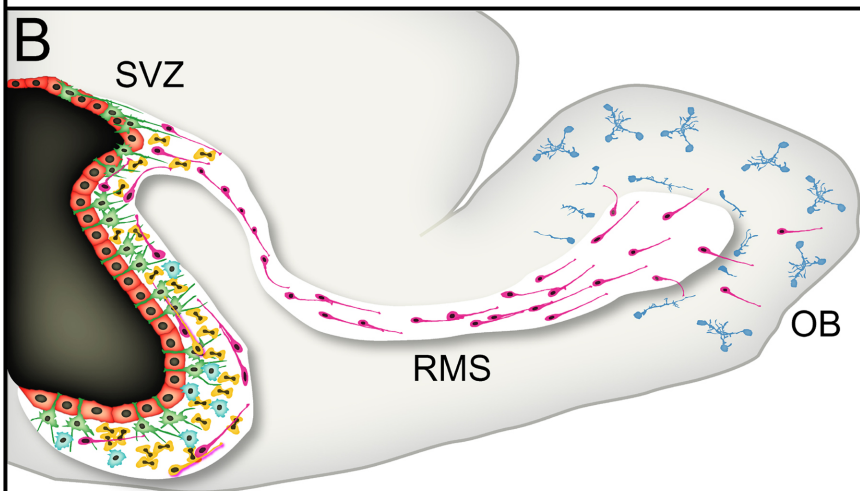**C**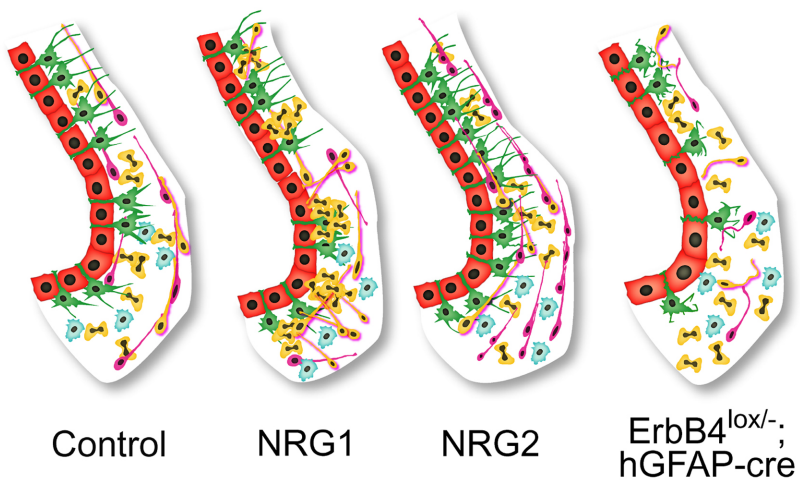

Supplement: pnas_0510410103_10.pdf [file pnas_0510410103_10.pdf]

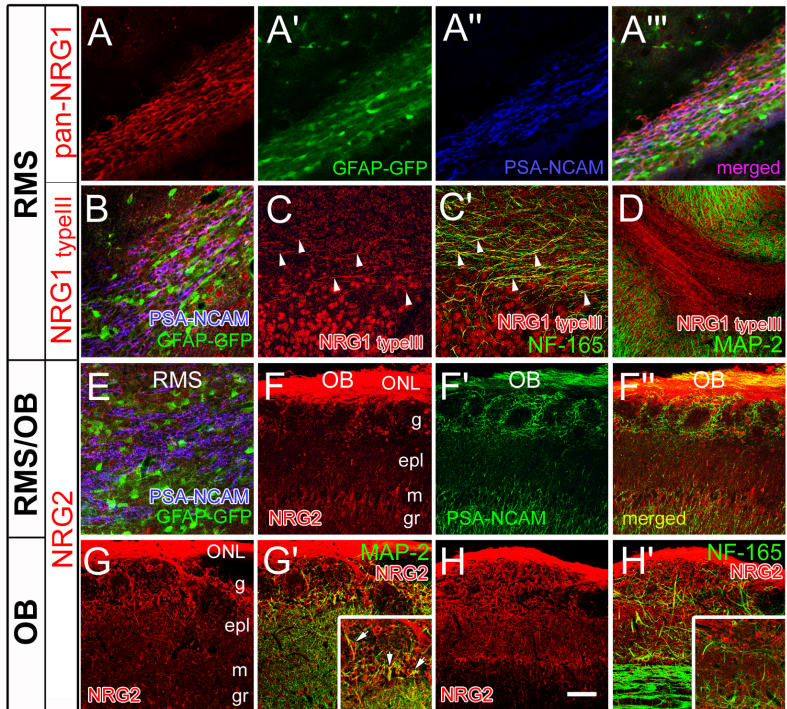

Supplement: pnas_0510410103_2.pdf [file pnas_0510410103_2.pdf]

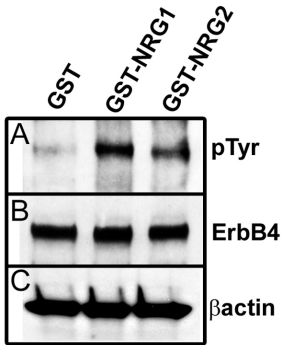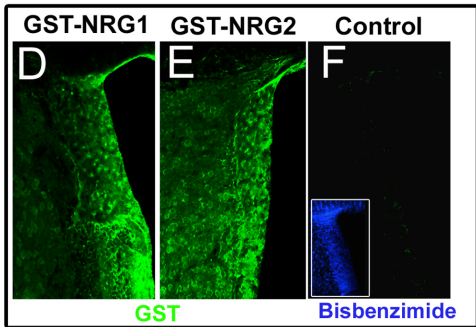

Supplement: pnas_0510410103_3.pdf [file pnas_0510410103_3.pdf]

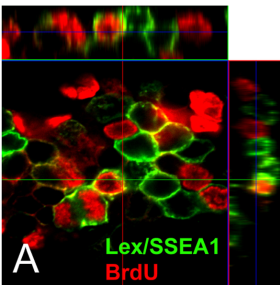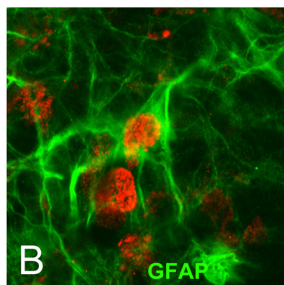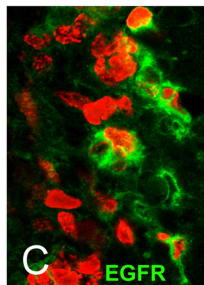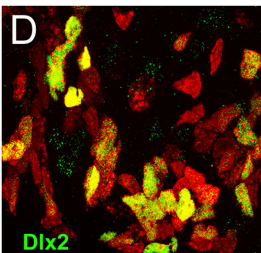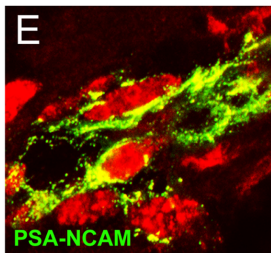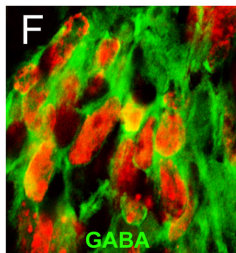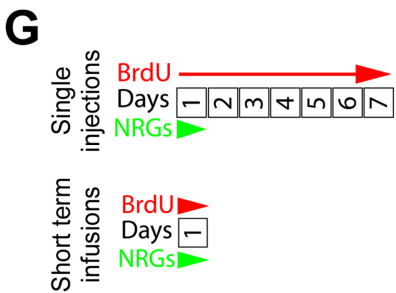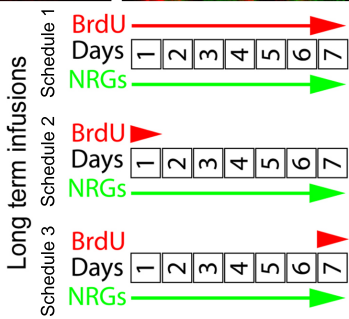

Supplement: pnas_0510410103_4.pdf [file pnas_0510410103_4.pdf]

**GST**

**GST-NRG1**

**A**

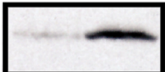

**Dlx2**

**B**

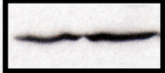

**$\beta$ actin**

Supplement: pnas_0510410103_5.pdf [file pnas_0510410103_5.pdf]

Longterm infusions

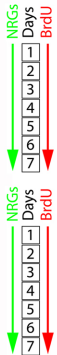

GFAP BrdU  
EGFR BrdU

Control

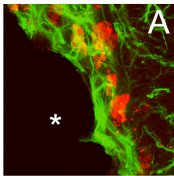

NRG1

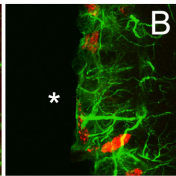

NRG2

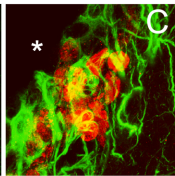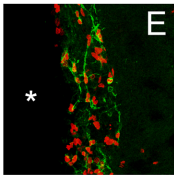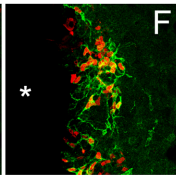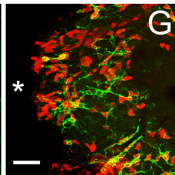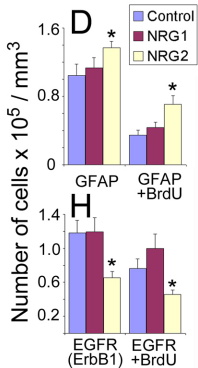

Supplement: pnas_0510410103_6.pdf [file pnas_0510410103_6.pdf]

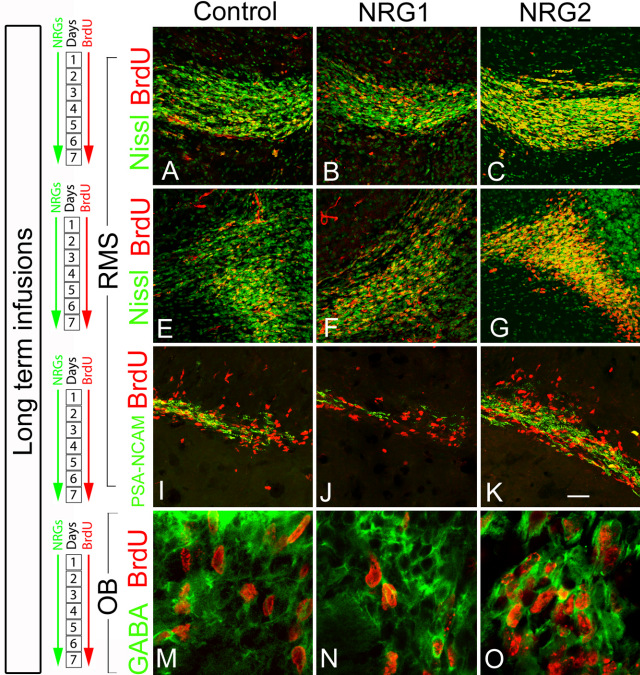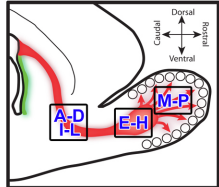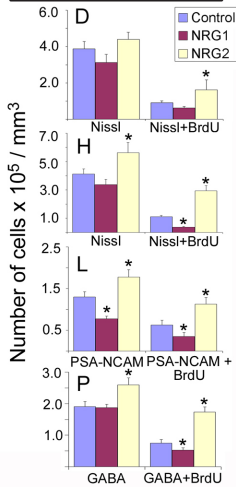

Supplement: pnas_0510410103_7.pdf [file pnas_0510410103_7.pdf]

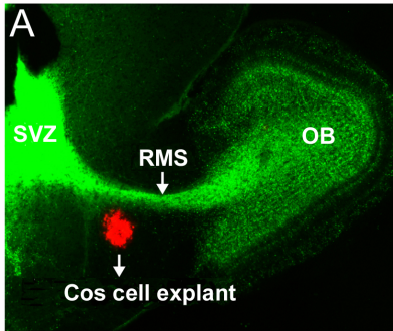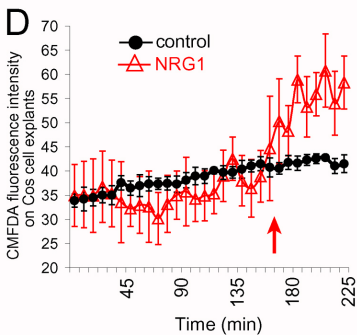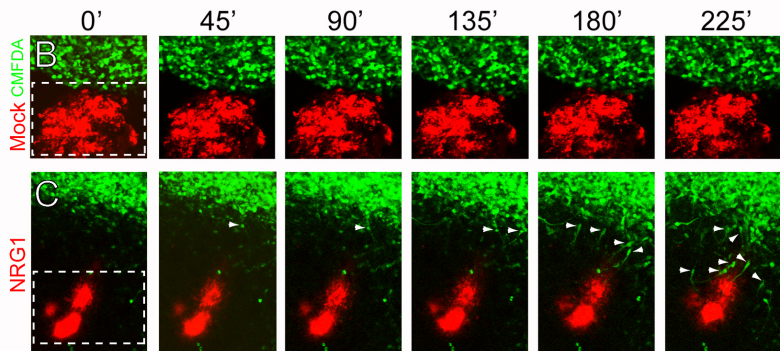

Supplement: pnas_0510410103_8.pdf [file pnas_0510410103_8.pdf]

**A** ErbB4<sup>lox/+</sup>; hGFAP-cre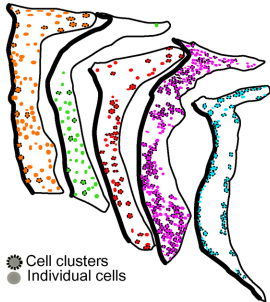**B** ErbB4<sup>lox/-</sup>; hGFAP-cre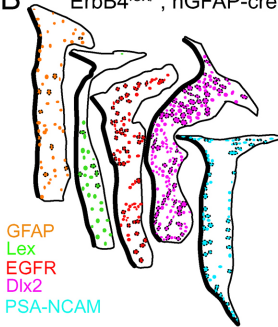**C**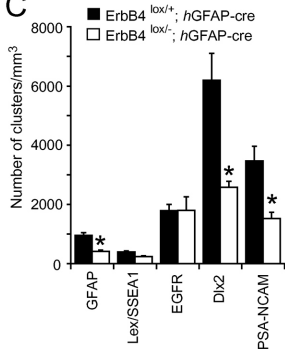

Supplement: pnas_0510410103_9.pdf [file pnas_0510410103_9.pdf]
